# Supplementary material
Source: PubMed Central journal article supplement (PMC9712390)
Supplement: 41598_2022_25342_MOESM1_ESM.pdf [file 41598_2022_25342_MOESM1_ESM.pdf]

Supplementary Table 1. Composition of twelve essential oils through gas chromatography coupled to mass spectrometry (GC-MS) and gas chromatography coupled to flame ionization detector (CG-FID).

| <i>Illicium verum</i>            |                     |                     |                |                      | <i>Syzygium aromaticum</i> |        |        |                        |        | <i>Thymus vulgaris</i> |        |        |                |        | <i>Eucalyptus globulus</i> |        |        |                                     |        |
|----------------------------------|---------------------|---------------------|----------------|----------------------|----------------------------|--------|--------|------------------------|--------|------------------------|--------|--------|----------------|--------|----------------------------|--------|--------|-------------------------------------|--------|
| Peak                             | RI exp <sup>y</sup> | RI lit <sup>t</sup> | Identification | Area % <sup>**</sup> | Peak                       | RI exp | RI lit | Identification         | Area % | Peak                   | RI exp | RI lit | Identification | Area % | Peak                       | RI exp | RI lit | Identification                      | Area % |
| 1                                | 1287                | 1282                | (E)-anetole    | 90.7                 | 1                          | 1361   | 1356   | eugenol                | 87.9   | 1                      | 930    | 932    | alpha-pinene   | 3.0    | 1                          | 930    | 932    | alpha-pinene                        | 2.0    |
| 2                                | 1356                | 1247                | triacetin      | 9.3                  | 2                          | 1413   | 1417   | (E)-beta-caryophyllene | 9.0    | 2                      | 944    | 946    | camphene       | 2.2    | 2                          | 973    | 974    | beta-pinene                         | 0.4    |
|                                  |                     |                     |                |                      | 3                          | 1446   | 1452   | alpha-humulene         | 1.9    | 3                      | 988    | 988    | myrcene        | 1.3    | 3                          | 988    | 988    | myrcene                             | 0.7    |
|                                  |                     |                     |                |                      | 4                          | 1517   | 1423   | delta-cadinene         | 0.3    | 4                      | 1021   | 1022   | p-cymene       | 21.7   | 4                          | 1003   | 1002   | alpha-phelandrene                   | 0.6    |
|                                  |                     |                     |                |                      | 5                          | 1545   | -      | n.i.                   | 0.2    | 5                      | 1025   | 1024   | limonene       | 3.4    | 5                          | 1014   | 1014   | alpha-terpinene                     | 0.2    |
|                                  |                     |                     |                |                      | 6                          | 1575   | 1582   | caryophyllene oxide    | 0.7    | 6                      | 1028   | 1026   | 1,8-cineole    | 2.5    | 6                          | 1022   | 1022   | p-cymene                            | 3.3    |
|                                  |                     |                     |                |                      |                            |        |        |                        |        | 7                      | 1099   | 1098   | linalool       | 6.0    | 7                          | 1026   | 1024   | limonene                            | 4.9    |
|                                  |                     |                     |                |                      |                            |        |        |                        |        | 8                      | 1162   | 1165   | borneol        | 3.4    | 8                          | 1030   | 1026   | 1,8-cineole                         | 86.2   |
|                                  |                     |                     |                |                      |                            |        |        |                        |        | 9                      | 1291   | 1289   | thymol         | 31.2   | 9                          | 1034   | 1032   | (Z)-beta-ocymene                    | 0.2    |
|                                  |                     |                     |                |                      |                            |        |        |                        |        | 10                     | 1301   | 1298   | carvacrol      | 25.5   | 10                         | 1044   | 1044   | (E)-beta-ocymene                    | 0.1    |
|                                  |                     |                     |                |                      |                            |        |        |                        |        |                        |        |        |                |        | 11                         | 1054   | 1054   | gamma-terpinene                     | 1.5    |
| Total:                           |                     |                     |                | -                    |                            |        |        |                        | 100.0  |                        |        |        |                | 100.0  |                            |        |        |                                     | 100.0  |
| Total identified:                |                     |                     |                | -                    |                            |        |        |                        | 100.0  |                        |        |        |                | 100.0  |                            |        |        |                                     | 100.0  |
| Monoterpenes (%):                |                     |                     |                | -                    |                            |        |        |                        | 0      |                        |        |        |                | 31.5   |                            |        |        |                                     | 13.8   |
| Oxygenated monoterpenoids (%):   |                     |                     |                | -                    |                            |        |        |                        | 0      |                        |        |        |                | 68.5   |                            |        |        |                                     | 86.2   |
| Sesquiterpenes (%):              |                     |                     |                | -                    |                            |        |        |                        | 11.2   |                        |        |        |                | -      |                            |        |        |                                     | -      |
| Oxygenated sesquiterpenoids (%): |                     |                     |                | -                    |                            |        |        |                        | 0.9    |                        |        |        |                | -      |                            |        |        |                                     | -      |
| Others (%):                      |                     |                     |                | -                    |                            |        |        |                        | 87.9   |                        |        |        |                | -      |                            |        |        |                                     | -      |
| <i>Cymbopogon citratus</i>       |                     |                     |                |                      | <i>Origanum vulgare</i>    |        |        |                        |        | <i>Citrus limon</i>    |        |        |                |        | <i>Matricaria recutita</i> |        |        |                                     |        |
| Peak                             | RI exp              | RI lit              | Identification | Area %               | Peak                       | RI exp | RI lit | Identification         | Area % | Peak                   | RI exp | RI lit | Identification | Area % | Peak                       | RI exp | RI lit | Identification                      | Area % |
| 1                                | 920                 | 921                 | tricyclene     | tr                   | 1                          | 920    | 921    | tricyclene             | 0.1    | 1                      | 924    | 924    | alpha-tujene   | 0.4    | 1                          | 1058   | 1056   | 3,3,6-trimethyl-1,5-heptadien-4-one | 0.1    |

|    |      |      |                         |      |    |      |      |                        |      |    |      |      |                        |      |    |      |      |                                |      |
|----|------|------|-------------------------|------|----|------|------|------------------------|------|----|------|------|------------------------|------|----|------|------|--------------------------------|------|
| 2  | 930  | 932  | alpha-pinene            | 0.1  | 2  | 924  | 924  | alpha-tujene           | 0.0  | 2  | 930  | 932  | alpha-pinene           | 1.8  | 2  | 1372 | 1374 | alpha-copaene                  | 0.3  |
| 3  | 945  | 946  | camphene                | 0.3  | 3  | 930  | 932  | alpha-pinene           | 1.2  | 3  | 945  | 946  | camphene               | 0.1  | 3  | 1379 | 1387 | alpha-isocomene                | 0.2  |
| 4  | 987  | 981  | 6-methyl-5-hepten-2-one | 0.4  | 4  | 945  | 946  | camphene               | 0.4  | 4  | 970  | 969  | sabinene               | 1.5  | 4  | 1386 | 1389 | beta-elemene                   | 0.1  |
| 5  | 990  | 988  | dehydro-1,8-cineole     | 0.1  | 5  | 973  | 974  | beta-pinene            | 0.3  | 5  | 974  | 974  | beta-pinene            | 10.4 | 5  | 1411 | 1417 | (E)-beta-caryophyllene         | 0.4  |
| 6  | 1025 | 1024 | limonene                | 0.9  | 6  | 977  | 974  | 1-octen-3-ol           | 0.1  | 6  | 988  | 988  | myrcene                | 1.5  | 6  | 1451 | 1454 | (E)-beta-farnesene             | 50.6 |
| 7  | 1034 | 1032 | (Z)-beta-ocymene        | 0.4  | 7  | 980  | -    | n.i.                   | 0.1  | 7  | 1004 | 1002 | alpha-phelandrene      | 0.1  | 7  | 1464 | -    | n.i.                           | 1.9  |
| 8  | 1044 | 1044 | (E)-beta-ocymene        | 0.2  | 8  | 988  | 988  | myrcene                | 1.6  | 8  | 1014 | 1014 | alpha-terpinene        | 0.2  | 8  | 1474 | 1480 | germacrene D                   | 1.0  |
| 9  | 1070 | -    | 4-nonanone              | 0.3  | 9  | 1003 | 1002 | alpha-phelandrene      | 0.2  | 9  | 1022 | 1022 | p-cymene               | 1.0  | 9  | 1479 | 1489 | beta-selinene                  | 0.4  |
| 10 | 1099 | 1098 | linalool                | 0.6  | 10 | 1008 | 1008 | delta-3-carene         | 0.1  | 10 | 1027 | 1024 | limonene               | 68.5 | 10 | 1489 | -    | n.i.                           | 0.6  |
| 11 | 1103 | -    | n.i.                    | 0.1  | 11 | 1014 | 1014 | alpha-terpinene        | 1.0  | 11 | 1029 | 1026 | 1,8-cineole            | 0.4  | 11 | 1503 | 1505 | (E,E)-alpha-farnesene          | 1.5  |
| 12 | 1142 | -    | n.i.                    | 0.6  | 12 | 1019 | 1020 | m-cymene               | 0.1  | 12 | 1044 | 1044 | (E)-beta-ocymene       | 0.1  | 12 | 1517 | 1523 | delta-cadinene                 | 0.2  |
| 13 | 1146 | -    | n.i.                    | 0.2  | 13 | 1022 | 1022 | p-cymene               | 10.4 | 13 | 1055 | 1054 | gamma-terpinene        | 9.3  | 13 | 1559 | -    | n.i.                           | 0.4  |
| 14 | 1150 | 1148 | citronellal             | 1.3  | 14 | 1025 | 1024 | limonene               | 0.6  | 14 | 1085 | 1086 | terpinolene            | 0.4  | 14 | 1570 | 1577 | spathulenol                    | 2.6  |
| 15 | 1162 | -    | n.i.                    | 1.8  | 15 | 1028 | 1026 | 1,8-cineole            | 0.5  | 15 | 1100 | 1098 | linalool               | 0.2  | 15 | 1586 | 1594 | salvial-4(14)-en-1-one         | 0.1  |
| 16 | 1180 | -    | n.i.                    | 2.6  | 16 | 1054 | 1054 | gamma-terpinene        | 4.8  | 16 | 1174 | 1174 | terpinen-4-ol          | 0.3  | 16 | 1605 | -    | n.i.                           | 0.3  |
| 17 | 1227 | 1223 | citronellol             | 1.1  | 17 | 1099 | 1098 | linalool               | 2.2  | 17 | 1188 | 1186 | alpha-terpineol        | 0.5  | 17 | 1610 | -    | n.i.                           | 0.4  |
| 18 | 1237 | 1235 | neral                   | 33.7 | 18 | 1162 | 1165 | borneol                | 0.2  | 18 | 1239 | 1235 | neral                  | 0.6  | 18 | 1620 | -    | n.i.                           | 0.2  |
| 19 | 1253 | 1249 | geraniol                | 4.5  | 19 | 1174 | 1174 | terpinen-4-ol          | 0.4  | 19 | 1268 | 1264 | geranial               | 0.8  | 19 | 1624 | -    | n.i.                           | 0.7  |
| 20 | 1266 | 1264 | geranial                | 45.5 | 20 | 1292 | 1289 | thymol                 | 0.4  | 20 | 1362 | 1359 | neryl acetate          | 0.5  | 20 | 1633 | 1638 | gossonorol + epi-alpha-cadinol | 1.1  |
| 21 | 1351 | 1350 | citronellyl acetate     | 0.2  | 21 | 1300 | 1298 | carvacrol              | 70.3 | 21 | 1411 | 1417 | (E)-beta-caryophyllene | 0.2  | 21 | 1649 | 1656 | alpha-bisabolol oxide B        | 8.5  |
| 22 | 1381 | 1379 | geranyl acetate         | 1.5  | 22 | 1412 | 1417 | (E)-beta-caryophyllene | 4.7  | 22 | 1429 | 1432 | (E)-alpha-bergamotene  | 0.5  | 22 | 1655 | -    | n.i.                           | 1.3  |
| 23 | 1386 | 1389 | beta-elemene            | 0.4  | 23 | 1445 | 1452 | alpha-humulene         | 0.1  | 23 | 1502 | 1505 | beta-bisabolene        | 0.8  | 23 | 1663 | -    | n.i.                           | 0.2  |
| 24 | 1411 | 1417 | (E)-beta-caryophyllene  | 0.9  | 24 | 1575 | 1582 | caryophyllene oxide    | 0.3  |    |      |      |                        |      | 24 | 1678 | 1685 | alpha-bisabolol                | 5.4  |
| 25 | 1445 | 1452 | alpha-humulene          | 0.1  |    |      |      |                        |      |    |      |      |                        |      | 25 | 1682 | -    | n.i.                           | 0.6  |
| 26 | 1473 | 1480 | germacrene D            | 0.2  |    |      |      |                        |      |    |      |      |                        |      | 26 | 1721 | 1730 | chamazulene                    | 2.0  |
| 27 | 1506 | 1513 | gamma-cadinene          | 0.4  |    |      |      |                        |      |    |      |      |                        |      | 27 | 1740 | 1748 | alpha-bisabolol oxide A        | 6.2  |
| 28 | 1516 | 1522 | delta-cadinene          | 0.3  |    |      |      |                        |      |    |      |      |                        |      | 28 | 1751 | -    | n.i.                           | 0.2  |
| 29 | 1543 | 1548 | elemol                  | 0.9  |    |      |      |                        |      |    |      |      |                        |      | 29 | 1794 | -    | n.i.                           | 0.1  |
| 30 | 1575 | 1572 | caryophyllene oxide     | 0.5  |    |      |      |                        |      |    |      |      |                        |      | 30 | 1841 | -    | n.i.                           | 0.2  |

|    |      |      |                             |      |
|----|------|------|-----------------------------|------|
| 31 | 1878 | 1879 | (Z)-chamomile<br>spiroether | 10.4 |
| 32 | 1892 | 1890 | (E)-chamomile<br>spiroether | 0.8  |
| 33 | 1946 | -    | n.i.                        | 0.4  |
| 34 | 2135 | 2135 | linoleic acid               | 0.2  |
| 35 | 2492 | 2500 | pentacosane                 | 0.3  |

|                              |       |       |       |       |
|------------------------------|-------|-------|-------|-------|
| Total:                       | 100.0 | 100.0 | 100.0 | 100.0 |
| Total identified:            | 94.8  | 99.9  | 100.0 | 92.4  |
| Monoterpenes :               | 1.9   | 20.7  | 95.3  | 0.0   |
| Oxygenated monoterpenoids:   | 93.7  | 74.0  | 3.2   | 0.1   |
| Sesquiterpenes:              | 2.3   | 4.8   | 1.5   | 55.2  |
| Oxygenated sesquiterpenoids: | 1.5   | 0.3   | 0.0   | 32.0  |
| Others:                      | 0.6   | 0.1   | 0.0   | 12.7  |

| <i>Rosmarinus officinalis</i> |        |        |                   |        | <i>Pelargonium graveolens</i> |        |        |                    |        | <i>Zingiber officinale</i> |        |        |                                    |        | <i>Melaleuca alternifolia</i> |        |        |                         |        |
|-------------------------------|--------|--------|-------------------|--------|-------------------------------|--------|--------|--------------------|--------|----------------------------|--------|--------|------------------------------------|--------|-------------------------------|--------|--------|-------------------------|--------|
| Peak                          | RI exp | RI lit | Identification    | Area % | Peak                          | RI exp | RI lit | Identification     | Area % | Peak                       | RI exp | RI lit | Identification                     | Area % | Peak                          | RI exp | RI lit | Identification          | Area % |
| 1                             | 918    | -      | n.i.              | tr     | 1                             | 930    | 932    | alpha-pinene       | 0.2    | 1                          | 920    | 921    | tricyclene                         | 0.4    | 1                             | 924    | 924    | alpha-tujene            | 1.0    |
| 2                             | 921    | 921    | tricyclene        | 0.7    | 2                             | 988    | 988    | myrcene            | 0.1    | 2                          | 930    | 932    | alpha-pinene                       | 2.1    | 2                             | 931    | 932    | alpha-pinene            | 2.5    |
| 3                             | 925    | 924    | alpha-tujene      | 0.1    | 3                             | 1025   | 1024   | limonene           | 0.1    | 3                          | 944    | 946    | camphene                           | 9.3    | 3                             | 970    | 969    | sabinene                | 1.3    |
| 4                             | 931    | 932    | alpha-pinene      | 15.3   | 4                             | 1070   | 1067   | cis-linalool oxide | 0.1    | 4                          | 970    | 969    | sabinene                           | 0.1    | 4                             | 974    | 974    | beta-pinene             | 0.8    |
| 5                             | 946    | 946    | camphene          | 6.5    | 5                             | 1099   | 1098   | linalool           | 7.8    | 5                          | 973    | 974    | beta-pinene                        | 0.3    | 5                             | 989    | 988    | myrcene                 | 0.8    |
| 6                             | 951    | -      | n.i.              | 0.2    | 6                             | 1109   | 1106   | cis-rose oxide     | 2.0    | 6                          | 986    | 981    | 6-methyl-5-hepten-2-ona<br>myrcene | 0.3    | 6                             | 1004   | 1002   | alpha-phelandrene       | 0.5    |
| 7                             | 975    | 974    | beta-pinene       | 5.1    | 7                             | 1125   | 1122   | trans-rose oxide   | 1.0    | 7                          | 988    | 988    | myrcene                            | 1.2    | 7                             | 1015   | 1014   | alpha-terpinene         | 10.3   |
| 8                             | 989    | 988    | myrcene           | 4.9    | 8                             | 1150   | 1148   | mentone            | 2.4    | 8                          | 1003   | 1002   | alpha-phelandrene                  | 0.4    | 8                             | 1022   | 1022   | p-cymene                | 1.8    |
| 9                             | 1004   | 1002   | alpha-phelandrene | 0.4    | 9                             | 1160   | 1158   | isomenthone        | 6.2    | 9                          | 1021   | 1022   | p-cymene                           | 0.1    | 9                             | 1026   | 1025   | beta-phelandrene        | 1.9    |
| 10                            | 1009   | 1008   | delta-3-carene    | 0.1    | 10                            | 1188   | 1186   | alpha-terpineol    | 0.2    | 10                         | 1025   | 1025   | beta-phelandrene                   | 5.8    | 10                            | 1028   | 1026   | 1,8-cineole             | 2.6    |
| 11                            | 1015   | 1014   | alpha-terpinene   | 0.3    | 11                            | 1229   | 1223   | citronellol        | 41.5   | 11                         | 1028   | 1026   | 1,8-cineole                        | 3.3    | 11                            | 1056   | 1054   | gamma-terpinene         | 20.6   |
| 12                            | 1022   | 1022   | p-cymene          | 2.0    | 12                            | 1253   | 1249   | geraniol           | 9.6    | 12                         | 1085   | 1086   | terpinolene                        | 0.2    | 12                            | 1065   | 1065   | cis-sabinene<br>hydrate | 0.2    |

|    |      |      |                        |      |    |      |      |                           |      |    |      |      |                        |      |    |      |      |                           |      |
|----|------|------|------------------------|------|----|------|------|---------------------------|------|----|------|------|------------------------|------|----|------|------|---------------------------|------|
| 13 | 1026 | 1024 | limonene               | 4.6  | 13 | 1269 | 1264 | geranial                  | 0.2  | 13 | 1095 | -    | n.i.                   | 0.3  | 13 | 1085 | 1086 | terpinolene               | 3.7  |
| 14 | 1030 | 1026 | 1,8-cineole            | 31.7 | 14 | 1273 | 1271 | citronellila formate      | 12.4 | 14 | 1099 | 1098 | linalool               | 0.3  | 14 | 1098 | 1098 | trans-sabinene hydrate    | 0.5  |
| 15 | 1055 | 1054 | gamma-terpinene        | 0.9  | 15 | 1300 | 1298 | geranyl formate           | 2.7  | 15 | 1161 | 1165 | borneol                | 1.4  | 15 | 1120 | 1118 | cis-p-menth-2-en-1-ol     | 0.4  |
| 16 | 1086 | 1086 | terpinolene            | 0.4  | 16 | 1351 | 1350 | citronellyl acetate       | 0.5  | 16 | 1174 | 1174 | terpinen-4-ol          | 0.3  | 16 | 1137 | 1136 | trans-p-menth-2-en-1-ol   | 0.3  |
| 17 | 1100 | 1098 | linalool               | 1.0  | 17 | 1369 | 1374 | alpha-copaene             | 0.2  | 17 | 1188 | 1186 | alpha-terpineol        | 0.6  | 17 | 1176 | 1174 | terpinen-4-ol             | 35.7 |
| 18 | 1142 | 1141 | camphor                | 16.6 | 18 | 1378 | 1387 | beta-bourbonene           | 0.6  | 18 | 1332 | 1335 | delta-elemene          | 0.2  | 18 | 1188 | 1186 | alpha-terpineol           | 2.4  |
| 19 | 1154 | 1155 | isoborneol             | 0.6  | 19 | 1386 | 1390 | beta-elemene              | 0.1  | 19 | 1358 | -    | n.i.                   | 0.2  | 19 | 1369 | 1374 | alpha-copaene             | 0.1  |
| 20 | 1163 | 1165 | borneol                | 1.8  | 20 | 1411 | 1417 | (E)-beta-caryophyllene    | 0.8  | 20 | 1369 | 1374 | alpha-copaene          | 0.7  | 20 | 1402 | 1409 | alpha-gurjunene           | 0.5  |
| 21 | 1175 | 1174 | terpinen-4-ol          | 0.5  | 21 | 1432 | 1437 | alpha-guayene             | 0.2  | 21 | 1386 | 1389 | beta-elemene           | 0.9  | 21 | 1412 | 1417 | (E)-beta-caryophyllene    | 0.6  |
| 22 | 1189 | 1186 | alpha-terpineol        | 1.5  | 22 | 1437 | 1442 | 6,9-guaiadiene            | 3.2  | 22 | 1401 | -    | n.i.                   | 0.3  | 22 | 1431 | 1439 | aromadendrene             | 1.7  |
| 23 | 1196 | 1199 | gamma-terpineol        | 0.2  | 23 | 1440 | -    | n.i.                      | 0.7  | 23 | 1412 | 1417 | (E)-beta-caryophyllene | 0.1  | 23 | 1436 | 1444 | seline-5,11-diene         | 0.2  |
| 24 | 1208 | 1204 | verbenone              | 0.7  | 24 | 1446 | 1452 | alpha-humulene            | 0.2  | 24 | 1428 | 1430 | gamma-elemene          | 0.6  | 24 | 1443 | 1450 | trans-muurola-3,5-diene   | 0.2  |
| 25 | 1283 | 1283 | isobornyl acetate      | 1.1  | 25 | 1453 | 1458 | allo-aromadendrene        | 0.2  | 25 | 1430 | 1432 | (E)-alpha-bergamotene  | 0.1  | 25 | 1445 | 1452 | alpha-humulene            | 0.2  |
| 26 | 1412 | 1417 | (E)-beta-caryophyllene | 2.6  | 26 | 1466 | 1465 | cis-muurola-4(14),5-diene | 0.1  | 26 | 1453 | 1458 | allo-aromadendrene     | 1.1  | 26 | 1453 | 1460 | allo-aromadendrene        | 0.7  |
| 27 | 1446 | 1452 | alpha-humulene         | 0.2  | 27 | 1473 | 1476 | geranyl propionate        | 1.1  | 27 | 1470 | 1478 | gamma-muurolene        | 0.5  | 27 | 1467 | 1475 | trans-cadina-1(6),4-diene | 0.3  |
|    |      |      |                        |      | 28 | 1488 | 1496 | viridiflorene             | 0.6  | 28 | 1474 | 1480 | germacrene D           | 1.4  | 28 | 1478 | 1489 | beta-selinene             | 0.1  |
|    |      |      |                        |      | 29 | 1507 | 1513 | gamma-cadinene            | 0.1  | 29 | 1478 | 1480 | ar-curcumene           | 6.6  | 29 | 1480 | -    | n.i.                      | 0.1  |
|    |      |      |                        |      | 30 | 1517 | 1522 | delta-cadinene            | 0.7  | 30 | 1486 | -    | n.i.                   | 1.1  | 30 | 1484 | 1495 | cis-cadina-1(6),4-diene   | 0.3  |
|    |      |      |                        |      | 31 | 1525 | 1530 | citronell butanoate       | 0.8  | 31 | 1493 | 1493 | alpha-zingiberene      | 34.9 | 31 | 1488 | -    | n.i.                      | 1.4  |
|    |      |      |                        |      | 32 | 1557 | 1562 | geranyl butanoate         | 0.7  | 32 | 1504 | 1505 | (E,E)-alpha-farnesene  | 10.6 | 32 | 1489 | 1494 | bicyclogermacrene         | 1.1  |
|    |      |      |                        |      | 33 | 1582 | 1584 | 2-phenyl-ethyl tiglate    | 0.8  | 33 | 1510 | -    | n.i.                   | 0.4  | 33 | 1494 | 1500 | alpha-muurolene           | 0.2  |
|    |      |      |                        |      | 34 | 1612 | 1622 | 10-epi-gamma-eudesmol     | 0.2  | 34 | 1520 | 1521 | beta-sesquiphelandrene | 11.8 | 34 | 1517 | 1522 | delta-cadinene            | 1.6  |
|    |      |      |                        |      | 35 | 1662 | 1666 | citronellyl tiglate       | 0.5  | 35 | 1527 | 1529 | (E)-gamma-bisabolene   | 0.3  | 35 | 1518 | -    | n.i.                      | 0.3  |
|    |      |      |                        |      | 36 | 1697 | 1696 | geranyl tiglate           | 1.2  | 36 | 1544 | 1548 | elemol                 | 0.4  | 36 | 1525 | 1533 | trans-cadina-1,4-diene    | 0.2  |
|    |      |      |                        |      |    |      |      |                           |      | 37 | 1549 | 1559 | germacrene B           | 0.3  | 37 | 1552 | -    | n.i.                      | 0.1  |
|    |      |      |                        |      |    |      |      |                           |      | 38 | 1560 | 1561 | (E)-nerolidol          | 0.3  | 38 | 1570 | 1577 | spathulenol               | 0.1  |
|    |      |      |                        |      |    |      |      |                           |      | 39 | 1585 | -    | n.i.                   | 0.2  | 39 | 1576 | -    | n.i.                      | 0.8  |
|    |      |      |                        |      |    |      |      |                           |      | 40 | 1609 | -    | n.i.                   | 0.3  | 40 | 1584 | 1592 | viridiflorol              | 0.3  |
|    |      |      |                        |      |    |      |      |                           |      |    |      |      |                        |      | 41 | 1586 | 1595 | cubeban-11-ol             | 0.3  |

|    |      |      |             |     |
|----|------|------|-------------|-----|
| 42 | 1595 | 1600 | rosifoliol  | 0.2 |
| 43 | 1615 | -    | n.i.        | 0.3 |
| 44 | 1621 | 1629 | epi-cubanol | 0.4 |
| 45 | 1631 | -    | n.i.        | 0.1 |
| 46 | 1635 | 1645 | cubanol     | 0.2 |

|                              |       |       |       |       |
|------------------------------|-------|-------|-------|-------|
| Total:                       | 100.0 | 100.0 | 100.0 | 100.0 |
| Total identified:            | 99.8  | 99.3  | 97.2  | 96.8  |
| Monoterpenes :               | 39.6  | 0.4   | 19.8  | 45.2  |
| Oxygenated monoterpenoids:   | 57.1  | 71.1  | 6.2   | 42.1  |
| Sesquiterpenes:              | 3.4   | 7.7   | 72.4  | 9.9   |
| Oxygenated sesquiterpenoids: | -     | 0.2   | 1.3   | 2.8   |
| Others:                      | -     | 20.7  | 0.3   | 0.0   |

n.i.: Not identified

tr: trace (<0.1%)

<sup>¥</sup>RI exp: Experimental Retention Index;

<sup>€</sup>RI lit: Literature Retention Index (Adams);

\*Essential oil labeled as *Illicium verum* containing non-corresponding composition and triacetin, which is not considered a natural compound;

\*\* Normalized and corrected percentage area with response factors.
